# Supplementary material for: Sumoylation of DNA-bound transcription factor Sko1 prevents its association with nontarget promoters
Source: PubMed Central journal article supplement (PMC6392331; doi:10.1371/journal.pgen.1007991), 2019-02-14

A

**Peaks analyzed:**  
52 peaks common to both replicates of all four ChIP-seq sets.

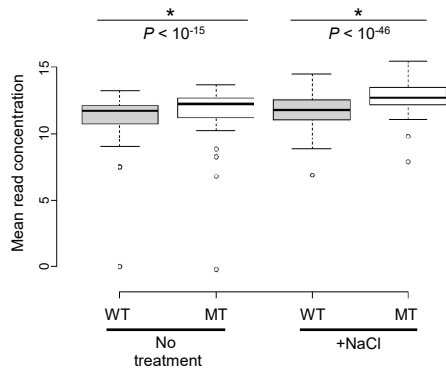

**Peaks analyzed:**  
212 peaks found in both replicates of Sko1-WT in either the untreated or +NaCl sets.

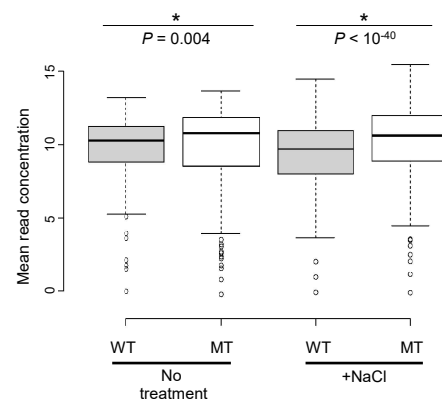

B

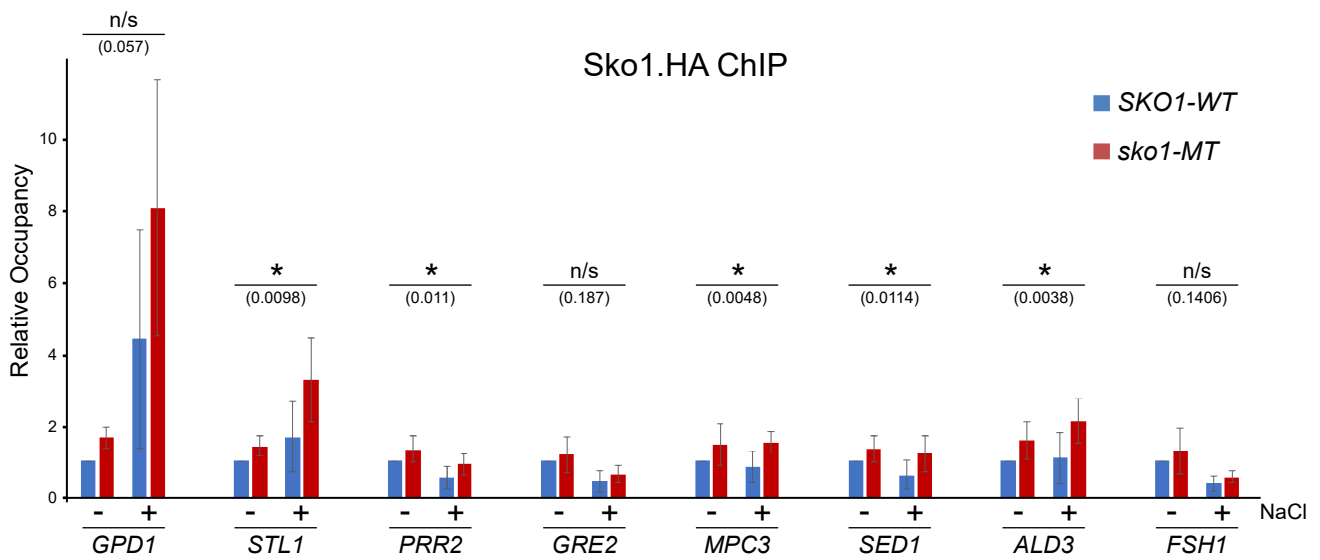

Supplement: pgen.1007991.s004.pdf [file pgen.1007991.s004.pdf]
