# Supplementary material for: Sumoylation of DNA-bound transcription factor Sko1 prevents its association with nontarget promoters
Source: PubMed Central journal article supplement (PMC6392331; doi:10.1371/journal.pgen.1007991), 2019-02-14

qRT-PCR

■ *SKO1-WT*  
 ■ *sko1-MT*

A

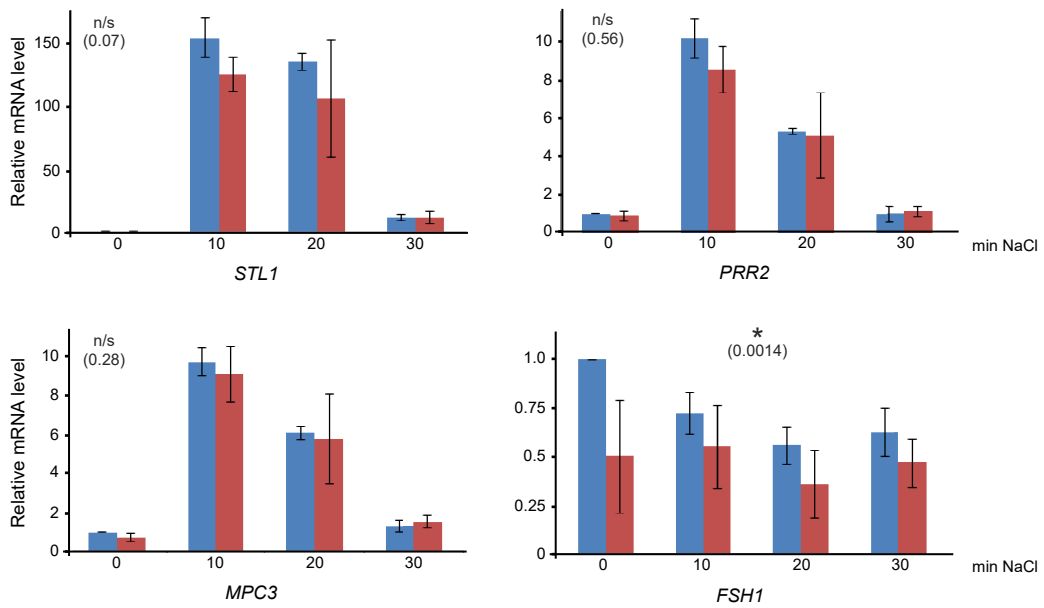

B

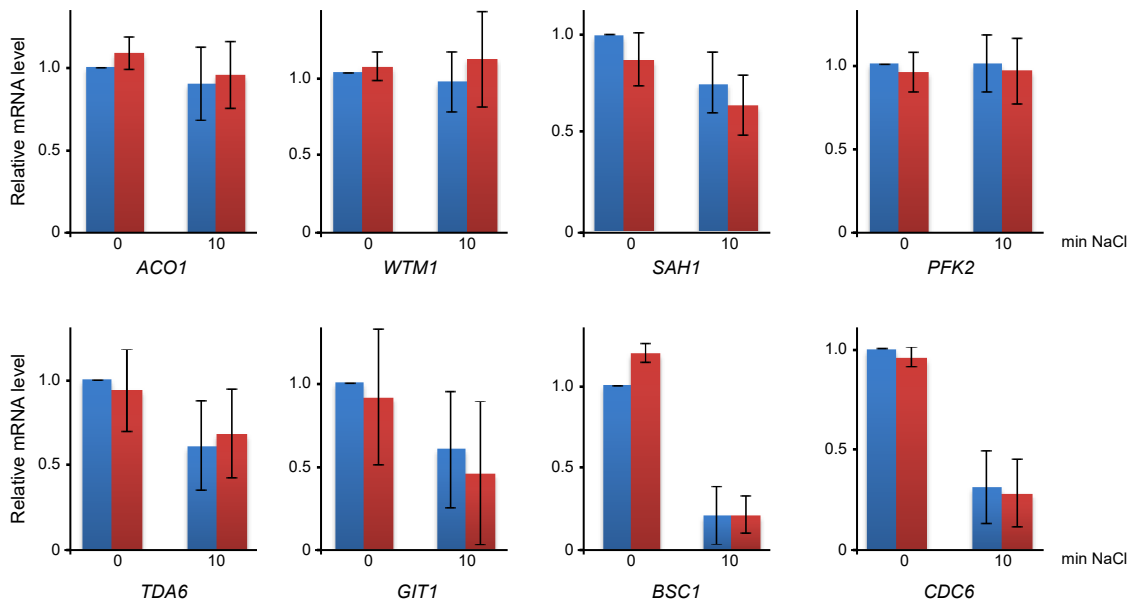

Supplement: pgen.1007991.s005.pdf [file pgen.1007991.s005.pdf]
