# Supplementary material for: Sumoylation of DNA-bound transcription factor Sko1 prevents its association with nontarget promoters
Source: PubMed Central journal article supplement (PMC6392331; doi:10.1371/journal.pgen.1007991), 2019-02-14

Hog1.Myc CHIP

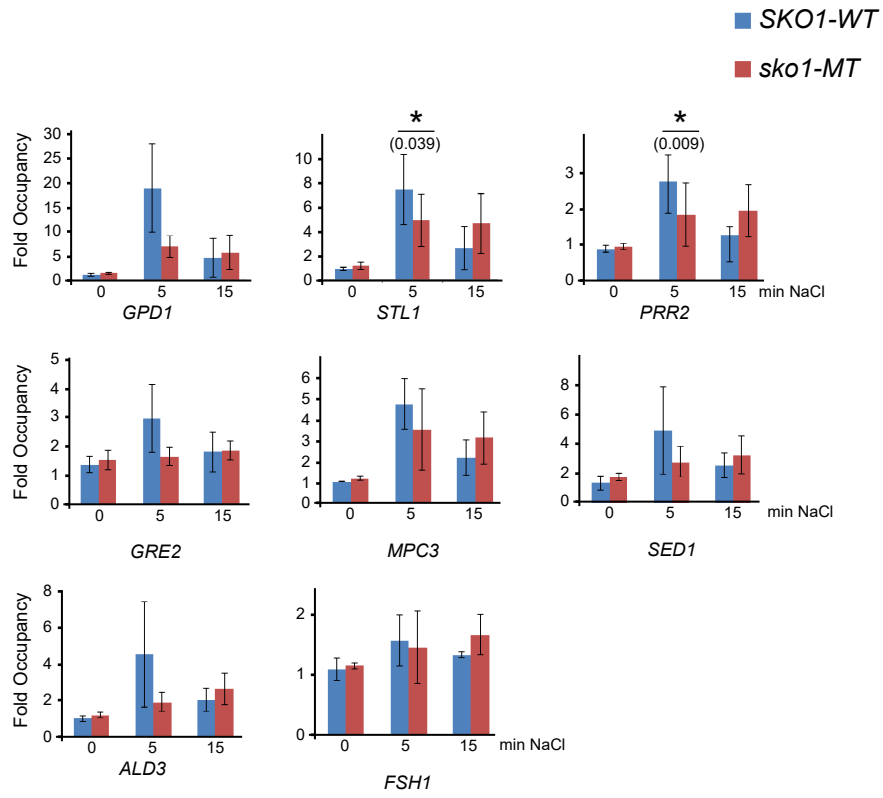

Supplement: pgen.1007991.s006.pdf [file pgen.1007991.s006.pdf]
